# Supplementary material
Source: publisher site journal article supplement (https://www.dovepress.com/article/380243)

ORIGINAL RESEARCH, [Mohammad Golriz] et al

**Supplementary Material**

**Prognostic value of red blood cell distribution width (RDW) in the recurrence of hepatocellular carcinoma following curative resection**

Mohammad Golriz1,2, Ali Ramouz1, Sadeq Ali-Hasan-Al-Saegh1, Saeed Shafiei1, Ehsan Aminizadeh1, Ahmed Hammad1, Markus Mieth1, Christian Rupp2,3, Christoph Springfeld2,4, Katrin Hoffmann1,2, Markus Büchler1, Arianeb Mehrabi1,2

1 Department of General, Visceral and Transplantation Surgery, Heidelberg University Hospital, Heidelberg, Baden-Württemberg, Germany

2 Liver Cancer Center Heidelberg (LCCH), Heidelberg University Hospital, Heidelberg, Baden-Württemberg, Germany

3 Department of Internal Medicine IV, Gastroenterology & Hepatology, Heidelberg University Hospital, Heidelberg, Baden-Württemberg, Germany

4 National Center for Tumor Diseases, Department of Medical Oncology, Heidelberg University Hospital, Heidelberg, Baden-Württemberg, Germany

**Correspondence to:**

Prof. Dr. med. Arianeb Mehrabi, MD, FICS, FEBS, FACS

Head of the Division of Liver Surgery,

Department of General, Visceral, and Transplantation Surgery,

Heidelberg University Hospital, Im Neuenheimer Feld 420,

69120 Heidelberg, Germany

E-Mail: arianeb.mehrabi@med.uni-heidelberg.de

Telephone: 0049 – 6221 – 5636223

Fax: 0049 – 6221 – 567470

**Type of article:** Original article

Propensity score matching was carried out between two groups of patients based on the RDW levels at different time points. The 3-year RFS was compared between patients considering the above-mentioned cutoff values defined for each checkpoint. Albeit non-significant, the rate of 3-year disease-free survival was higher among patients with RDW levels of ≤14.25% compared to that of patients with RDW levels of >14.25% (P= 0.150) (Figure S1). However, the RFS of patients with RDW ≤16.15% was still significantly higher than that of patients with higher RDW levels (P= 0.033) (Figure S2). Also, at 12th month postoperative, patients with RDW levels of ≤15.85 had significantly higher rate of RFS compared to patients with RDW >15.85 (P= 0.005) (Figure S3).

**Figure S1**. Kaplan–Meier RFS curves of HCC patients after liver resection after propensity score matching of patients with preoperative level of RDW ≤ 14.25% and preoperative level of RDW > 14.25%.


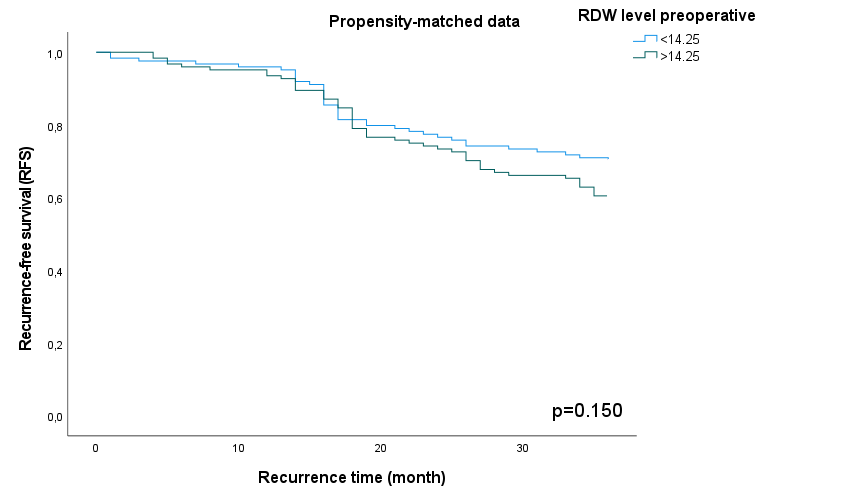


**Figure S2**. Kaplan–Meier RFS curves of HCC patients after liver resection after propensity score matching of patients with level of RDW ≤ 16.15% and > 16.15%.


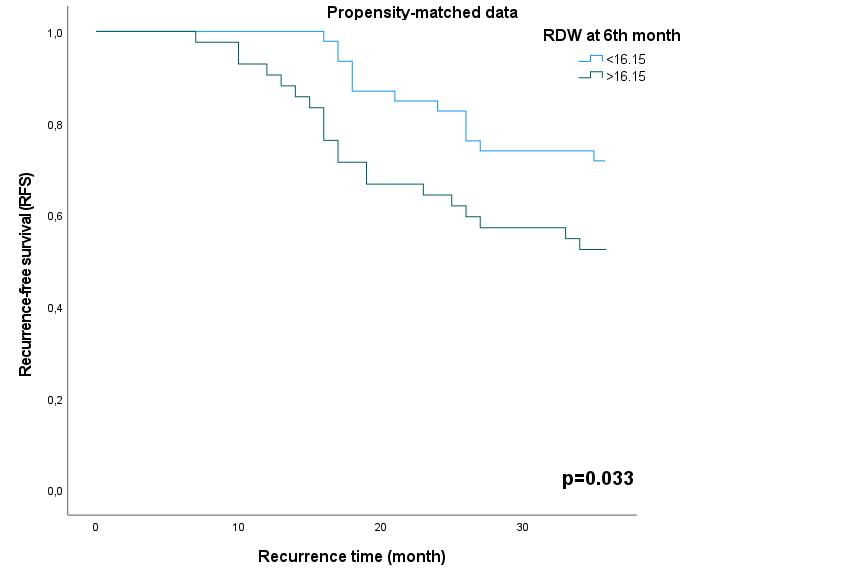


**Figure S3**. Kaplan–Meier RFS curves of HCC patients after liver resection after propensity score matching of patients with level of RDW ≤ 15.85% and > 15.85%.


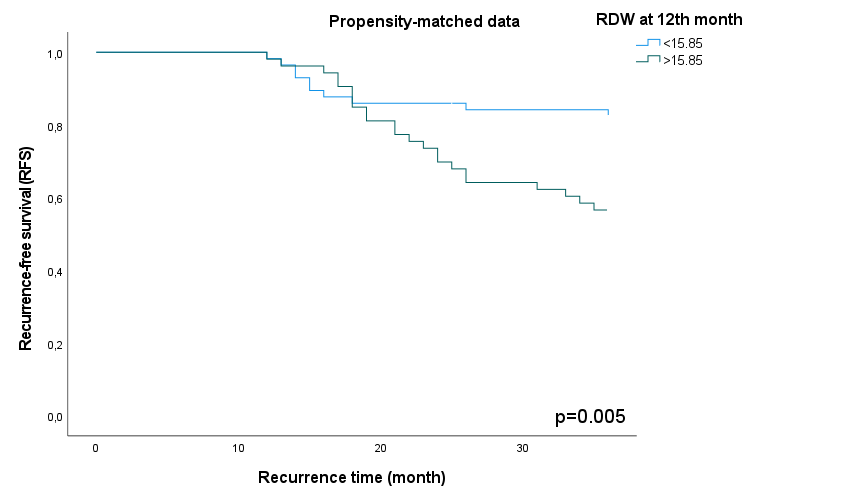

Supplement: Supplementary file 1 [file get_supplementary_file.php]
